# 1 Black and Native Overdose Mortality Overtook that of 2 White Individuals During the COVID-19 Pandemic

3  
4 Joseph Friedman, MPH<sup>1,2</sup>, Helena Hansen, MD, PhD<sup>2</sup>

5  
6 <sup>1</sup>Medical Scientist Training Program, University of California, Los Angeles

7 <sup>2</sup>Center for Social Medicine and Humanities, University of California, Los Angeles

## 8 9 10 **Abstract**

11 Drug overdose mortality rates have increased sharply during the COVID-19 pandemic. In recent  
12 years, overdose death rates were rising most rapidly among racial/ethnic minority  
13 communities. The pandemic has disproportionately affected communities of color in a wide  
14 swath of health, social, and economic outcomes. Careful attention is therefore warranted to  
15 trends in overdose mortality by race/ethnicity during COVID-19. We calculated total drug  
16 overdose death rates per 100,000 population by race/ethnicity for the 1999-2020 time period.  
17 We find that Black overdose mortality overtook that of White individuals in 2020 for the first  
18 time since 1999. Between 2019 and 2020 Black individuals had the largest percent increase in  
19 overdose mortality, of 48.8%, compared to 26.3% among White individuals. In 2020, Black  
20 overdose death rates rose to 36.8 per 100,000, representing 16.3% higher than the rate for  
21 White individuals for the same period. American Indian and Alaska Native (AI/AN) individuals  
22 experienced the highest rate of overdose mortality in 2020, of 41.4 per 100,000, representing  
23 30.8% higher than the rate among White individuals. Our findings suggest that drug overdose  
24 mortality is increasingly becoming a racial justice issue in the United States and appears to have  
25 been exacerbated by the COVID-19 pandemic. Providing individuals with a safer supply of  
26 drugs, closing gaps in access to MOUD and harm reductions services, and ending routine  
27 incarceration of individuals with substance use disorders represent urgently needed, evidence-  
28 based strategies that can be employed to reduce rising inequalities in overdose.

29  
30  
31  
32  
33  
34  
35  
36  
37  
38  
39  
40  
41  
42

## 43 **Introduction**

44 Drug overdose mortality rates have increased sharply during the COVID-19 pandemic<sup>1</sup>. In recent  
45 years, overdose death rates were rising most rapidly among racial/ethnic minority  
46 communities<sup>2</sup>. The pandemic has disproportionately affected communities of color in a wide  
47 swath of health, social, and economic outcomes. Careful attention is therefore warranted to  
48 trends in overdose mortality by race/ethnicity during COVID-19.

## 49 **Methods**

50 We calculated total drug overdose death rates per 100,000 population by race/ethnicity for the  
51 1999-2020 time period, using data obtained from the National Center for Health Statistics<sup>3</sup>.  
52 Records from 2020 were provisional and may underestimate the final level of drug overdose  
53 related mortality. Drug overdose deaths were classified as those assigned with the underlying  
54 cause of death in the ICD-10 categories pertaining to unintentional, suicide, homicide, or  
55 undetermined intent drug overdose deaths, (X40-44, X60-64, X85, or Y10-14, respectively). We  
56 calculated annual percent change in a race/ethnicity specific fashion for the 2000-2020 period.  
57 All analyses were conducted using R version 4.0.3. See appendix for more details.

## 58 **Results**

59 We find that Black overdose mortality overtook that of White individuals in 2020 for the first  
60 time since 1999. In 2020, Black overdose death rates rose to 36.8 per 100,000, representing  
61 16.3% higher than the rate for White individuals for the same period. This is a sharp reversal of  
62 the Black-White overdose mortality gap noted in 2010, when the rate among White individuals  
63 was double (100.1% higher) than that seen among Black individuals. These shifts reflect that

64 Black communities have experienced higher annual percent increases in overdose deaths  
65 compared to their White counterparts each year since 2012. In 2020 Black individuals had the  
66 largest percent increase in overdose mortality, of 48.8%, compared to 26.3% among White  
67 individuals.

68 American Indian and Alaska Native (AI/AN) individuals experienced the highest rate of overdose  
69 mortality in 2020, of 41.4 per 100,000, representing 30.8% higher than the rate among White  
70 individuals. Between 1999 and 2017 AI/AN overdose mortality rates were close to those  
71 experienced by White individuals, with rates among AI/AN first overtaking those of Whites by a  
72 large margin in 2019. In 2020 overdose mortality increased by 43.3% for AI/AN individuals.

73 Drug overdose rates among Latinx individuals remained the lowest among the 4 race/ethnicity  
74 groups assessed throughout the study period, however they also experienced a large percent  
75 increase in 2020 of 40.1%.

76 For all race/ethnicity groups assessed, the relative increases observed in 2020 were higher than  
77 any prior percent change observed between 1999-2019.

## 78 **Discussion**

79 The overdose crisis in the United States is increasingly driven by a toxic illicit drug supply  
80 characterized by polysubstance use of potent synthetic opioids and benzodiazepines, as well as  
81 high-purity methamphetamine. The high—and unpredictably variable—potency of the illicit  
82 drug supply may be disproportionately harming communities of color for various reasons.

83 Deep-seated inequalities in living conditions including stable housing and employment, policing

84 and arrests, preventive care, harm reduction, telehealth, medications for opioid use disorder  
85 (MOUD) and naloxone, are likely playing a key role<sup>4,5</sup>.

86 Further, the increasing toxicity of the drug supply has increased the lethality of recent  
87 incarceration—which disproportionately affects Black and Native individuals due to structural  
88 racism in the criminal justice system—as a risk factor for overdose mortality. Recently  
89 incarcerated individuals have reduced opioid tolerance and less knowledge of shifts in drug  
90 potency<sup>6</sup>.

91 Drug overdose mortality is increasingly becoming a racial justice issue in the United States and  
92 appears to have been exacerbated by the COVID-19 pandemic. Providing individuals with a  
93 safer supply of drugs, closing gaps in access to MOUD, health care, and harm reduction  
94 services, and ending routine incarceration of individuals with substance use disorders represent  
95 urgently needed, evidence-based strategies that can be employed to reduce rising inequalities  
96 in overdose.

97

98

99

100

101

102

103

104

105

106  
107  
108  
109  
110  
111  
112  
113  
114  
115  
116

### Drug Overdose Mortality By Race/Ethnicity, 1999–2020

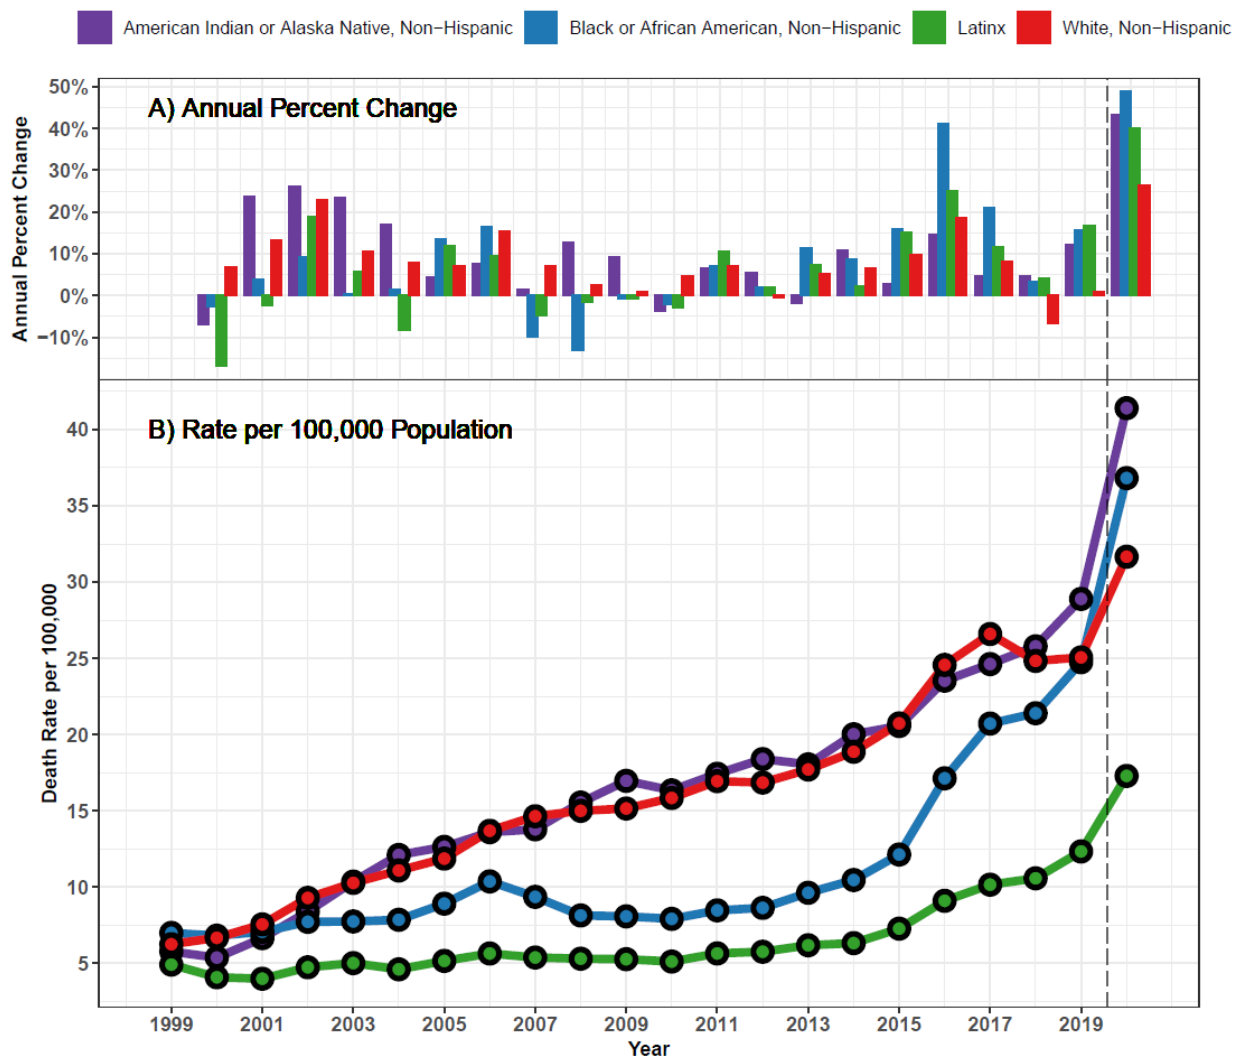

**Figure 1. Drug Overdose Mortality by Race/Ethnicity, 1999–2020**

Year-to-year percent change in drug overdose mortality by race/ethnicity (top). Drug overdose mortality per 100,000 population by race/ethnicity (bottom). A vertical dashed line separates the COVID-19 pandemic period from prior trends.

117 **References**

- 118 1. Friedman J, Akre S. COVID-19 and the Drug Overdose Crisis: Uncovering the Deadliest Months in the  
119 United States, January–July 2020. *Am J Public Health*. Published online April 15, 2021:e1-e8.  
120 doi:10.2105/AJPH.2021.306256
- 121 2. James K, Jordan A. The Opioid Crisis in Black Communities. *J Law Med Ethics*. 2018;46(2):404-421.  
122 doi:10.1177/1073110518782949
- 123 3. National Center for Health Statistics. Provisional Drug Overdose Deaths by Quarter and  
124 Demographics - 2019 to 2020. Published online 2021. Accessed October 23, 2021.  
125 [https://www.cdc.gov/nchs/data/health\\_policy/Provisional-Drug-Overdose-Deaths-by-Quarter-and-](https://www.cdc.gov/nchs/data/health_policy/Provisional-Drug-Overdose-Deaths-by-Quarter-and-Demographic-Characteristics-2019-to-2020.pdf)  
126 [Demographic-Characteristics-2019-to-2020.pdf](https://www.cdc.gov/nchs/data/health_policy/Provisional-Drug-Overdose-Deaths-by-Quarter-and-Demographic-Characteristics-2019-to-2020.pdf)
- 127 4. Lagisetty PA, Ross R, Bohnert A, Clay M, Maust DT. Buprenorphine Treatment Divide by  
128 Race/Ethnicity and Payment. *JAMA Psychiatry*. 2019;76(9):979-981.  
129 doi:10.1001/jamapsychiatry.2019.0876
- 130 5. Park JN, Rouhani S, Beletsky L, Vincent L, Saloner B, Sherman SG. Situating the Continuum of  
131 Overdose Risk in the Social Determinants of Health: A New Conceptual Framework. *The Milbank*  
132 *Quarterly*. 2020;98(3):700-746. doi:10.1111/1468-0009.12470
- 133 6. Brinkley-Rubinstein L, Macmadu A, Marshall BDL, et al. Risk of fentanyl-involved overdose among  
134 those with past year incarceration: Findings from a recent outbreak in 2014 and 2015. *Drug and*  
135 *Alcohol Dependence*. 2018;185:189-191. doi:10.1016/j.drugalcdep.2017.12.014

136  
137  
138  
139  
140  
141  
142  
143  
144  
145  
146  
147  
148  
149  
150  
151  
152  
153  
154  
155  
156  
157  
158

## 159 **Methods Appendix**

### 160 **Data Preparation and Definitions**

- 161 1. Total drug overdose mortality counts for the 1999-2019 period were obtained from the CDC  
162 WONDER platform (<https://wonder.cdc.gov/controller/saved/D76/D243F427>) stratified by race,  
163 ethnicity, and year of occurrence. Both population counts, and counts of overdose fatalities  
164 were provided, and used as the denominator and numerator, respectively.
- 165 2. Overdose mortality rates for 2020 were calculated using provisional race/ethnicity stratified  
166 drug overdose mortality counts released by the National Center for Health Statistics  
167 ([https://www.cdc.gov/nchs/data/health\\_policy/Provisional-Drug-Overdose-Deaths-by-Quarter-  
168 and-Demographic-Characteristics-2019-to-2020.pdf](https://www.cdc.gov/nchs/data/health_policy/Provisional-Drug-Overdose-Deaths-by-Quarter-and-Demographic-Characteristics-2019-to-2020.pdf)).
- 169 3. Mid-year population estimates by race/ethnicity for the year 2020 were obtained from the CDC  
170 Wonder platform (<https://wonder.cdc.gov/single-race-single-year-v2020.html>).
- 171 4. Total drug overdoses were defined by the following ICD-10 codes:

|                                                                                                                                                             |
|-------------------------------------------------------------------------------------------------------------------------------------------------------------|
| X40 (Accidental poisoning by and exposure to nonopioid analgesics, antipyretics and antirheumatics)                                                         |
| X41 (Accidental poisoning by and exposure to antiepileptic, sedative-hypnotic, antiparkinsonism and psychotropic drugs, not elsewhere classified)           |
| X42 (Accidental poisoning by and exposure to narcotics and psychodysleptics [hallucinogens], not elsewhere classified)                                      |
| X43 (Accidental poisoning by and exposure to other drugs acting on the autonomic nervous system)                                                            |
| X44 (Accidental poisoning by and exposure to other and unspecified drugs, medicaments and biological substances)                                            |
| X60 (Intentional self-poisoning by and exposure to nonopioid analgesics, antipyretics and antirheumatics)                                                   |
| X61 (Intentional self-poisoning by and exposure to antiepileptic, sedative-hypnotic, antiparkinsonism and psychotropic drugs, not elsewhere classified)     |
| X62 (Intentional self-poisoning by and exposure to narcotics and psychodysleptics [hallucinogens], not elsewhere classified)                                |
| X63 (Intentional self-poisoning by and exposure to other drugs acting on the autonomic nervous system)                                                      |
| X64 (Intentional self-poisoning by and exposure to other and unspecified drugs, medicaments and biological substances)                                      |
| X85 (Assault by drugs, medicaments and biological substances)                                                                                               |
| Y10 (Poisoning by and exposure to nonopioid analgesics, antipyretics and antirheumatics, undetermined intent)                                               |
| Y11 (Poisoning by and exposure to antiepileptic, sedative-hypnotic, antiparkinsonism and psychotropic drugs, not elsewhere classified, undetermined intent) |
| Y12 (Poisoning by and exposure to narcotics and psychodysleptics [hallucinogens], not elsewhere classified, undetermined intent)                            |
| Y13 (Poisoning by and exposure to other drugs acting on the autonomic nervous system, undetermined intent)                                                  |
| Y14 (Poisoning by and exposure to other and unspecified drugs, medicaments and biological substances, undetermined intent)                                  |

- 172
- 173 5. 'Latinx' individuals were defined as any persons for which ethnicity was defined as Hispanic or  
174 Latino, regardless of race. "American Indian or Alaska Native, Non-Hispanic," "Black or African  
175 American, Non-Hispanic," and "White, Non-Hispanic" individuals were defined as individuals of  
176 each race, who had their ethnicity listed as "non-Hispanic."
- 177 6. Rates were calculated as total drug overdose deaths per 100,000 population, according to mid-  
178 year population.
- 179 7. Year-to-year percent change values were calculated for each year  $t$  in a race/ethnicity group-  
180 specific fashion according to the following formula:
- 181 
$$((\text{Overdose Death Rate}_t / \text{Overdose Death Rate}_{t-1}) - 1) * 100\%.$$
- 182 8. Data were visualized using R version 4.0.3.

### 183 **Methodological Consideration**

- 184 1. Records from 2020 were provisional and may underestimate the final level of drug  
185 overdose related mortality.
- 186 2. Race/ethnicity may be incorrectly assigned in some overdose deaths. This is a known  
187 issue especially for Native individuals.

- 188           3. It was not possible to age-standardize the race/ethnicity stratified results given the  
189           format of the provisional records from 2020. This is an important area of consideration  
190           for future work.
- 191           4. This work is descriptive, not causal in nature, and it was not possible to show causally  
192           what percent of increases in overdose death rates between 2019 and 2020 stem from  
193           the COVID-19 pandemic directly.
